# Supplementary material
Source: PubMed Central journal article supplement (PMC5289745)
Supplement: NIHMS843682-supplement-Fig__S1.pdf [file NIHMS843682-supplement-Fig__S1.pdf]

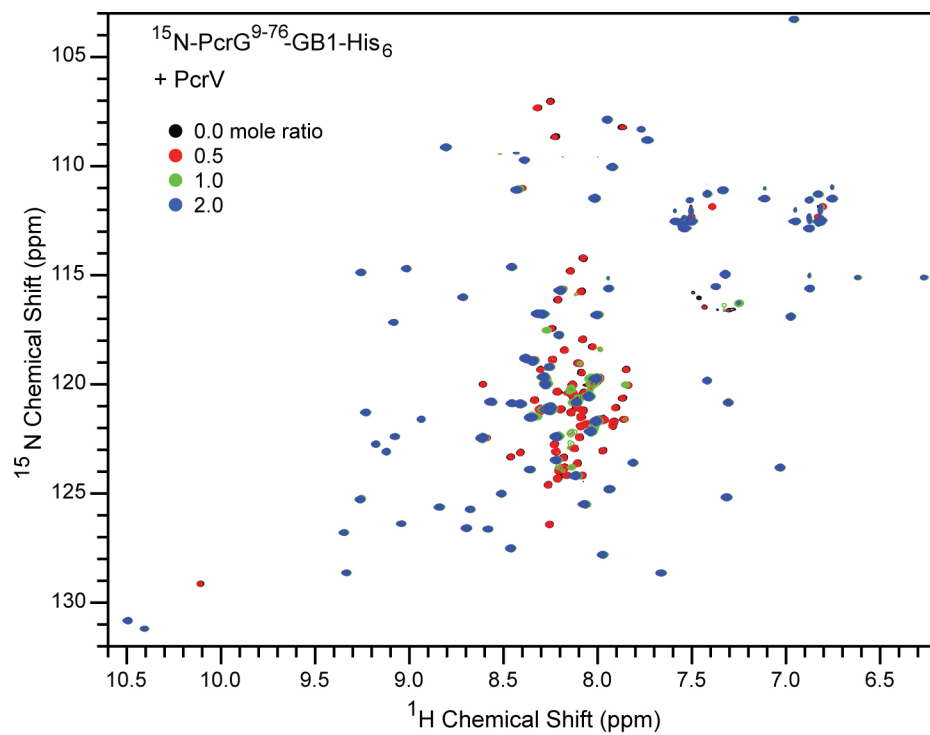

**Supplementary Figure S1.** Four overlaid 2D  $^1\text{H}$ - $^{15}\text{N}$  HSQC spectra PcrG<sup>9-76</sup>-GB1-His<sub>6</sub> with increasing molar ratios of PcrV.
